# Supplementary material for: Quantifying Variability of Avian Colours: Are Signalling Traits More Variable?
Source: PLoS One. 2008 Feb 27;3(2):e1689. doi: 10.1371/journal.pone.0001689 (PMC2253496; doi:10.1371/journal.pone.0001689)
Supplement: Table S3 — Indicates level of sexual dimorphism in coloration (ΔSsex and ΔLsex), means and 95% confidence intervals levels of chromatic (ΔSvar) and achromatic variability (ΔLvar) for males and females and associated F-tests for the four used illuminants. Means and 95%CIs have been back-transformed after Box-Cox transformation prior to analysis. (0.06 MB XLS) [file pone.0001689.s003.xls]

## Sheet: Sheet1
Table S3
Indicates level of sexual dimorphism in coloration (ΔSsex and ΔLsex), means and 95% confidence intervals levels of chromatic (ΔSvar) and
achromatic variability (ΔLvar) for males and females and associated F-tests for the four used illuminants.
Means and 95%CIs have been back-transformed after Box-Cox transformation prior to analysis.
								Chromatic Variability ΔSvar (Illuminant = D65)
			Sexual dimorphism			Males				Females			F	df	p
	colour patch		ΔSsex		Mean	Lower 95%	Upper 95%		Mean	Lower 95%	Upper 95%
Robin	back		0.527		1.37828	0.91018	2.02185		1.12796	0.634711	1.88899		0.416494	1,29	0.523765
Erithacus rubecula	breast		1.67		2.38416	1.61851	3.41536		2.67839	1.59013	4.2946		0.163253	1,29	0.689143
Blackbird	back		5.56		1.0434	0.849495	1.27115		1.05156	0.665267	1.5995		0.00146935	1,38	0.969624
Turdus merula	bill		9.44		2.03329	1.60279	2.55166		1.94988	1.09622	3.26783		0.0303373	1,38	0.862652
	breast		8.71		0.889729	0.701698	1.11603		1.72563	0.905405	3.05516		7.30551	1,38	0.010221
	head		9.21		1.2496	1.04381	1.48666		1.46619	0.880781	2.32826		0.689797	1,38	0.411421
Blackcap	back		1.48		0.911843	0.716722	1.14732		0.88581	0.708175	1.09743		0.0254503	1,64	0.873753
Sylvia atricapilla	breast		2.748		0.682453	0.54302	0.84916		1.25219	0.82785	1.83503		8.74569	1,64	0.00434325
	head		16.9		1.02337	0.856952	1.2147		1.54821	0.990114	2.33363		4.70117	1,64	0.0338666
Great tit	back		1.59		1.76047	1.36068	2.24917		1.31596	0.989183	1.72389		2.57083	1,48	0.115412
Parus major	breast		0.724		1.95362	1.40013	2.66974		2.42006	1.75576	3.27175		0.962673	1,48	0.331434
	cheek		0.908		0.503666	0.381192	0.655772		0.820625	0.527774	1.23107		4.15492	1,48	0.0470432
	head		5.81		1.29293	1.00553	1.64259		1.18326	0.928373	1.49129		0.281356	1,48	0.598259
Blue tit	back		2.68		1.35508	1.01168	1.78597		1.51311	1.17374	1.92679		0.368093	1,35	0.547961
Cyanistes caeruleus	breast		1.72		2.70658	1.95	3.68164		2.02824	1.35219	2.95113		1.49447	1,35	0.229693
	cheek		1.71		0.630758	0.482066	0.814067		0.878464	0.663034	1.14657		3.39394	1,35	0.0739215
	head		5.25		1.69506	1.22433	2.3006		2.01741	1.40048	2.83479		0.606422	1,35	0.441371
Greenfinch	back		3.47		1.74214	1.42645	2.11142		1.36165	0.981725	1.85103		1.96763	1,59	0.16594
Carduelis chloris	breast		8.1		2.19876	1.77441	2.70066		2.65828	2.08661	3.34891		1.29501	1,59	0.259726
	head		4.491		2.29049	1.83702	2.8294		1.08983	0.790937	1.47294		15.1646	1,59	0.00025371
	rump		2.268		1.75918	1.34463	2.27019		2.3104	1.73048	3.03633		1.77272	1,59	0.188167
	tail		5.275		2.79413	2.15658	3.57427		3.54065	2.33874	5.19257		1.14633	1,59	0.288679
Table S3 (cont.)
								Achromatic Variability ΔLvar (Illuminant = D65)
						Males				Females
	colour patch		Sexual dimorphism		Mean	Lower 95%	Upper 95%		Mean	Lower 95%	Upper 95%		F	df	p
Robin	back		0.68		1.082	0.550771	1.84027		1.15343	0.58574	1.96465		0.0265797	1,29	0.871623
Erithacus rubecula	breast		0.17		1.72593	1.25509	2.2894		1.25067	0.716813	1.97122		1.5176	1,29	0.22788
Blackbird	back		8.99		3.07381	2.30173	3.98346		2.10434	1.12778	3.46527		1.80898	1,38	0.186604
Turdus merula	bill		6.8		3.27107	2.27583	4.49003		2.65627	1.35287	4.51628		0.393222	1,38	0.53436
	breast		17.4		2.63776	1.75673	3.74143		1.15174	0.426662	2.33988		4.0097	1,38	0.0524127
	head		13.57		2.07959	1.46238	2.83134		1.94755	0.930599	3.44159		0.0408341	1,38	0.840936
Blackcap	back		0.59		1.67485	1.29528	2.11436		1.23702	0.748907	1.87847		1.6958	1,64	0.197505
Sylvia atricapilla	breast		0.88		2.11336	1.55407	2.7787		2.46542	1.50725	3.71853		0.376166	1,64	0.541836
	head		22.08		2.21905	1.66298	2.87393		1.29245	0.767125	1.98955		4.445	1,64	0.038924
Great tit	back		1.39		1.1976	0.819327	1.70423		1.51991	1.03201	2.17701		0.884499	1,48	0.351681
Parus major	breast		3.47		1.8489	1.385	2.42951		1.36889	0.725525	2.40428		1.01128	1,48	0.31964
	cheek		1.259		1.47386	0.966865	2.1742		1.9968	1.40556	2.7721		1.37718	1,48	0.246373
	head		3.37		1.65651	0.93869	2.75854		2.41151	1.5572	3.60533		1.26167	1,48	0.266923
Blue tit	back		1.535		1.97912	1.49463	2.54734		1.23324	0.689881	1.97521		3.46144	1,35	0.0712346
Cyanistes caeruleus	breast		1.538		1.11303	0.694226	1.65533		1.59614	1.04484	2.29285		1.70788	1,35	0.199783
	cheek		1.089		2.11143	1.27282	3.2158		2.87513	1.88647	4.12308		1.163	1,35	0.288221
	head		2.007		2.66218	1.77969	3.76554		2.76903	1.73043	4.11259		0.0215546	1,35	0.88412
Greenfinch	back		2.43		1.27129	0.926856	1.6829		1.50017	0.883597	2.32142		0.401181	1,59	0.528928
Carduelis chloris	breast		1.87		1.6279	1.21062	2.12135		1.92552	1.26074	2.76556		0.515854	1,59	0.47545
	head		2.68		1.32953	0.926045	1.82343		1.45027	0.869706	2.21679		0.094871	1,59	0.759159
	rump		1.54		2.40855	1.85826	3.04654		1.24429	0.796188	1.81715		8.11567	1,59	0.0060329
	tail		3.46		2.45237	1.83015	3.18679		3.63584	2.32316	5.31517		2.85043	1,59	0.0966293
Table S3 (cont.)
								Chromatic Variability ΔSvar (Illuminant = Green light)
	colour patch		Sexual dimorphism		Mean	Lower 95%	Upper 95%		Mean	Lower 95%	Upper 95%		F	df	p
Robin	back		0.545		1.38068	0.891866	2.06353		1.19971	0.683549	1.98908		0.200753	1,29	0.657444
Erithacus rubecula	breast		1.66		2.38696	1.64376	3.37744		2.71565	1.63694	4.30028		0.213435	1,29	0.647535
Blackbird	back		5.88		1.08905	0.884803	1.32938		1.0532	0.640939	1.65463		0.0254097	1,38	0.874195
Turdus merula	bill		9.36		2.07991	1.66025	2.58034		1.9426	1.09727	3.24343		0.086925	1,38	0.769728
	breast		9.19		0.915281	0.713852	1.15981		1.83765	1.04275	3.05679		8.43504	1,38	0.0061021
	head		9.63		1.29507	1.07059	1.55568		1.50267	0.905005	2.38122		0.559841	1,38	0.45893
Blackcap	back		1.46		0.950271	0.748725	1.19306		0.939962	0.747192	1.17061		0.00364625	1,64	0.952038
Sylvia atricapilla	breast		2.84		0.763176	0.614396	0.939475		1.31477	0.888637	1.89065		7.78709	1,64	0.00692645
	head		17.38		1.05749	0.885194	1.25563		1.66127	1.12521	2.38457		6.51775	1,64	0.0130753
Great tit	back		1.75		1.76203	1.36721	2.24321		1.34946	1.00672	1.77979		2.14774	1,48	0.1493
Parus major	breast		0.785		1.97063	1.41181	2.69385		2.48914	1.84548	3.30104		1.20946	1,48	0.276924
	cheek		0.921		0.566031	0.426585	0.739769		0.89892	0.580279	1.3443		3.74111	1,48	0.058996
	head		5.79		1.31968	1.03023	1.67081		1.2048	0.944285	1.51988		0.301412	1,48	0.585544
Blue tit	back		2.877		1.36013	1.02339	1.7802		1.53186	1.20143	1.9313		0.456414	1,35	0.503744
Cyanistes caeruleus	breast		1.99		2.7138	1.97183	3.66399		2.06072	1.36412	3.01663		1.37311	1,35	0.249194
	cheek		1.852		0.685659	0.54079	0.860035		0.935499	0.691551	1.24389		3.13182	1,35	0.0854905
	head		5.397		1.7067	1.23492	2.31277		2.06765	1.44829	2.88282		0.75789	1,35	0.389922
Greenfinch	back		3.62		1.81318	1.48948	2.19088		1.38224	1.00026	1.87289		2.45247	1,59	0.122689
Carduelis chloris	breast		8.21		2.23959	1.81723	2.73706		2.75913	2.18757	3.44437		1.66109	1,59	0.202487
	head		4.88		2.36048	1.89717	2.91018		1.20342	0.915271	1.55997		13.6679	1,59	0.0004801
	rump		2.34		1.70798	1.30124	2.2106		2.37822	1.81417	3.07459		2.65329	1,59	0.108664
	tail		5.18		2.81483	2.19905	3.56141		3.53248	2.34455	5.15946		1.12637	1,59	0.292876
Table S3 (cont.)
								Achromatic Variability ΔLvar (Illuminant = Green light)
	colour patch		Sexual dimorphism		Mean	Lower 95%	Upper 95%		Mean	Lower 95%	Upper 95%		F	df	p
Robin	back		0.679		1.11799	0.582214	1.87474		1.21729	0.658209	1.99316		0.0526609	1,29	0.820107
Erithacus rubecula	breast		0.12		1.76065	1.2797	2.33636		1.18404	0.626892	1.96492		1.98574	1,29	0.16942
Blackbird	back		8.79		2.94299	2.21693	3.84794		1.95892	1.07788	3.34		2.12268	1,38	0.153346
Turdus merula	bill		6.58		3.06694	2.17124	4.2365		2.46657	1.326	4.28398		0.451971	1,38	0.505468
	breast		17.1		2.3313	1.49299	3.50988		1.05187	0.457804	2.14595		3.40411	1,38	0.0728386
	head		13.24		1.90794	1.33147	2.66876		1.80133	0.859594	3.431		0.0280707	1,38	0.867831
Blackcap	back		0.54		1.68211	1.30242	2.12148		1.24206	0.753777	1.88296		1.71354	1,64	0.195208
Sylvia atricapilla	breast		0.807		2.10253	1.53904	2.77452		2.47301	1.50651	3.73925		0.408489	1,64	0.525019
	head		21.58		2.21669	1.66352	2.86766		1.33929	0.823034	2.01273		4.05635	1,64	0.048213
Great tit	back		1.46		1.19981	0.82048	1.70803		1.49455	0.991278	2.18417		0.712208	1,48	0.402898
Parus major	breast		3.5		1.84962	1.38142	2.43696		1.43796	0.805541	2.41683		0.795055	1,48	0.377024
	cheek		1.29		1.47993	0.972768	2.17951		2.00631	1.41812	2.77525		1.40248	1,48	0.24214
	head		3.6		1.66049	0.937373	2.77368		2.40479	1.55409	3.59291		1.21766	1,48	0.275321
Blue tit	back		1.416		1.94933	1.46437	2.51971		1.24003	0.6917	1.98982		3.10055	1,35	0.0870017
Cyanistes caeruleus	breast		1.596		1.12897	0.71945	1.65359		1.56337	1.01249	2.26333		1.42751	1,35	0.240205
	cheek		1.144		2.11094	1.27543	3.21		2.86687	1.88037	4.11233		1.14783	1,35	0.291337
	head		2.255		2.63362	1.74583	3.7484		2.85272	1.85422	4.11914		0.0939672	1,35	0.761009
Greenfinch	back		2.5		1.29425	0.949075	1.70549		1.50369	0.881495	2.33434		0.333753	1,59	0.565656
Carduelis chloris	breast		1.86		1.63296	1.21395	2.12856		1.94385	1.27418	2.78959		0.55626	1,59	0.458732
	head		2.8		1.34105	0.94042	1.82972		1.44784	0.859772	2.22802		0.0746099	1,59	0.785693
	rump		1.55		2.40943	1.85752	3.04958		1.22514	0.767161	1.81699		8.2612	1,59	0.00562338
	tail		3.41		2.4626	1.84066	3.19608		3.67907	2.36978	5.34728		3.02181	1,59	0.0873685
Table S3 (cont.)
								Chromatic Variability ΔSvar (Illuminant = Woodland shade)
	colour patch		Sexual dimorphism		Mean	Lower 95%	Upper 95%		Mean	Lower 95%	Upper 95%		F	df	p
Robin	back		0.54		1.38982	0.899375	2.07417		1.19618	0.678585	1.99017		0.227885	1,29	0.636675
Erithacus rubecula	breast		1.67		2.41734	1.67027	3.41072		2.72288	1.63845	4.31776		0.182183	1,29	0.672656
Blackbird	back		5.87		1.09305	0.890582	1.33078		1.05188	0.644043	1.64425		0.0342857	1,38	0.854085
Turdus merula	bill		9.32		2.0853	1.6639	2.58807		1.94038	1.09859	3.23356		0.0966933	1,38	0.757534
	breast		9.17		0.912549	0.712433	1.1553		1.83846	1.0382	3.07008		8.51587	1,38	0.00588511
	head		9.64		1.2796	1.05467	1.54137		1.51646	0.920592	2.3873		0.725266	1,38	0.399757
Blackcap	back		1.47		0.948463	0.747542	1.19043		0.937099	0.74525	1.16657		0.00446495	1,64	0.946933
Sylvia atricapilla	breast		2.847		0.758531	0.610113	0.934524		1.31522	0.887447	1.89402		7.90885	1,64	0.00652392
	head		17.39		1.05546	0.879034	1.25914		1.6491	1.10629	2.3867		6.04945	1,64	0.0166232
Great tit	back		1.76		1.78454	1.38505	2.27131		1.36838	1.02502	1.79815		2.15706	1,48	0.148439
Parus major	breast		0.79		1.99801	1.43336	2.72805		2.5106	1.85784	3.33516		1.15577	1,48	0.287718
	cheek		0.929		0.564488	0.425858	0.737078		0.898132	0.579838	1.34299		3.78086	1,48	0.0577148
	head		5.82		1.31995	1.02973	1.67221		1.21588	0.950971	1.53679		0.242746	1,48	0.624476
Blue tit	back		2.873		1.36733	1.02646	1.79327		1.54889	1.21401	1.9539		0.496091	1,35	0.485883
Cyanistes caeruleus	breast		1.998		2.74723	1.99428	3.71216		2.08373	1.37868	3.05158		1.37913	1,35	0.248178
	cheek		1.849		0.686856	0.539861	0.864257		0.937657	0.695383	1.24319		3.13941	1,35	0.0851283
	head		5.391		1.71635	1.24306	2.32394		2.07285	1.45177	2.89034		0.735287	1,35	0.397009
Greenfinch	back		3.68		1.82443	1.49672	2.20719		1.38814	1.00299	1.88344		2.45773	1,59	0.122296
Carduelis chloris	breast		8.36		2.27181	1.84083	2.77999		2.77965	2.20149	3.47335		1.53359	1,59	0.220479
	head		4.94		2.38527	1.91673	2.94126		1.20365	0.910604	1.56771		13.9441	1,59	0.00042625
	rump		2.39		1.74112	1.32777	2.25153		2.41398	1.84171	3.12041		2.5985	1,59	0.112302
	tail		5.28		2.8527	2.22748	3.61104		3.56769	2.36074	5.22441		1.08355	1,59	0.302152
Table S3 (cont.)
								Achromatic Variability ΔLvar (Illuminant = Woodland shade)
	colour patch		Sexual dimorphism		Mean	Lower 95%	Upper 95%		Mean	Lower 95%	Upper 95%		F	df	p
Robin	back		0.664		1.15308	0.61212	1.91033		1.24764	0.686805	2.01936		0.0475926	1,29	0.828834
Erithacus rubecula	breast		0.1058		1.77446	1.28814	2.35698		1.10182	0.527446	1.94497		2.41944	1,29	0.130685
Blackbird	back		8.63		2.94879	2.22549	3.849		1.9236	1.04979	3.3013		2.34254	1,38	0.134167
Turdus merula	bill		6.22		3.11345	2.21138	4.28847		2.41341	1.28296	4.22891		0.620103	1,38	0.435893
	breast		16.85		2.31454	1.47318	3.50271		1.04717	0.452678	2.14703		3.30068	1,38	0.0771448
	head		12.99		1.93327	1.36888	2.67013		1.824	0.904923	3.37258		0.0312725	1,38	0.860573
Blackcap	back		0.51		1.68674	1.30406	2.12993		1.25076	0.763721	1.88811		1.66936	1,64	0.20099
Sylvia atricapilla	breast		0.729		2.09973	1.53281	2.77677		2.47829	1.50253	3.75968		0.419221	1,64	0.519642
	head		21.12		2.21485	1.66279	2.8644		1.34447	0.823896	2.02448		3.97918	1,64	0.0503284
Great tit	back		1.465		1.27966	0.867495	1.79131		1.59902	1.06674	2.26523		0.78623	1,48	0.379664
Parus major	breast		3.5		1.91045	1.42477	2.48393		1.64574	0.923746	2.63006		0.308648	1,48	0.581091
	cheek		1.31		1.63656	1.05652	2.37475		2.12566	1.53304	2.83796		1.12159	1,48	0.294876
	head		3.81		2.0061	1.13666	3.18611		2.61196	1.65978	3.83347		0.680287	1,48	0.413568
Blue tit	back		1.348		1.91717	1.42922	2.49343		1.28846	0.740262	2.02752		2.47492	1,35	0.124673
Cyanistes caeruleus	breast		1.593		1.16843	0.779148	1.65577		1.51149	0.953434	2.23005		0.934404	1,35	0.340353
	cheek		1.196		2.10403	1.26945	3.20262		2.85817	1.8713	4.10523		1.14264	1,35	0.292413
	head		2.524		2.59544	1.70052	3.7259		2.92652	1.96227	4.13027		0.218959	1,35	0.642735
Greenfinch	back		2.41		1.31327	0.967423	1.72431		1.49457	0.868706	2.3336		0.248973	1,59	0.619654
Carduelis chloris	breast		2.06		1.60391	1.17723	2.11201		1.92848	1.25001	2.7902		0.581256	1,59	0.448858
	head		2.7		1.31978	0.915631	1.8155		1.43203	0.837992	2.22577		0.0803108	1,59	0.777869
	rump		1.5		2.40594	1.84445	3.05916		1.22239	0.775675	1.79586		8.14859	1,59	0.00593758
	tail		3.28		2.47163	1.85283	3.20025		3.72362	2.43022	5.36065		3.25849	1,59	0.0761577
Table S3 (cont.)
								Chromatic Variability ΔSvar (Illuminant = Uniform Irradiance)
	colour patch		Sexual dimorphism		Mean	Lower 95%	Upper 95%		Mean	Lower 95%	Upper 95%		F	df	p
Robin	back		0.586		1.38018	0.883478	2.07869		1.25318	0.724418	2.05353		0.0956328	1,29	0.759346
Erithacus rubecula	breast		1.68		2.39894	1.65591	3.3876		2.77233	1.68855	4.35244		0.276066	1,29	0.603286
Blackbird	back		6.037		1.07389	0.866095	1.31978		1.08625	0.658687	1.71162		0.00283041	1,38	0.95785
Turdus merula	bill		9.38		2.10075	1.68023	2.60154		1.93648	1.09184	3.23785		0.124646	1,38	0.726
	breast		9.49		0.921011	0.722324	1.1612		1.90046	1.10113	3.1084		9.62955	1,38	0.00360476
	head		9.89		1.29359	1.05508	1.57341		1.52577	0.900414	2.45847		0.617421	1,38	0.43688
Blackcap	back		1.46		0.977441	0.776198	1.21841		0.98436	0.784167	1.2235		0.00161835	1,64	0.968036
Sylvia atricapilla	breast		2.87		0.798382	0.642834	0.982681		1.3582	0.930172	1.93102		7.66524	1,64	0.00735545
	head		17.75		1.07587	0.906238	1.27		1.74482	1.20155	2.46891		8.06862	1,64	0.00603263
Great tit	back		1.82		1.78151	1.38616	2.26232		1.38502	1.03701	1.82075		1.95723	1,48	0.168239
Parus major	breast		0.81		1.99658	1.42906	2.73158		2.53862	1.89927	3.3396		1.30402	1,48	0.259145
	cheek		0.928		0.597302	0.448711	0.782883		0.938922	0.604733	1.40681		3.53012	1,48	0.0663433
	head		5.85		1.33971	1.04387	1.69911		1.19528	0.933156	1.51326		0.462337	1,48	0.4998
Blue tit	back		2.989		1.36666	1.02462	1.7945		1.56158	1.23178	1.95851		0.574358	1,35	0.453605
Cyanistes caeruleus	breast		2.108		2.74773	2.00575	3.69466		2.08429	1.37197	3.06582		1.38426	1,35	0.247316
	cheek		1.913		0.711672	0.568295	0.88263		0.966402	0.708079	1.29515		3.07327	1,35	0.0883451
	head		5.485		1.73655	1.26059	2.34651		2.10474	1.47987	2.92484		0.776764	1,35	0.384145
Greenfinch	back		3.71		1.85098	1.52131	2.23547		1.3956	1.00368	1.90139		2.62937	1,59	0.110236
Carduelis chloris	breast		8.38		2.28039	1.85017	2.78716		2.81926	2.23887	3.51422		1.72216	1,59	0.194498
	head		5.04		2.40296	1.9309	2.96315		1.22997	0.931989	1.59972		13.4193	1,59	0.00053461
	rump		2.41		1.71643	1.30509	2.2255		2.43631	1.8709	3.13085		2.97091	1,59	0.0900111
	tail		5.23		2.8631	2.24387	3.61207		3.58306	2.38519	5.22009		1.12193	1,59	0.293821
Table S3 (cont.)
								Achromatic Variability ΔLvar (Illuminant = Uniform Irradiance)
	colour patch		Sexual dimorphism		Mean	Lower 95%	Upper 95%		Mean	Lower 95%	Upper 95%		F	df	p
Robin	back		0.6528		1.16389	0.621496	1.92106		1.27084	0.708203	2.04054		0.0607631	1,29	0.80703
Erithacus rubecula	breast		0.13		1.75697	1.27851	2.32935		1.09467	0.520944	1.93909		2.36884	1,29	0.13462
Blackbird	back		8.53		3.10671	2.34574	3.99929		2.01662	1.05326	3.37545		2.39247	1,38	0.13021
Turdus merula	bill		6.24		3.35235	2.34642	4.58054		2.55039	1.26368	4.40993		0.675785	1,38	0.41617
	breast		16.72		2.59721	1.71454	3.70792		1.16182	0.443693	2.32396		3.70974	1,38	0.0616012
	head		12.87		2.04949	1.44217	2.78894		1.96704	0.992248	3.3643		0.01661	1,38	0.898133
Blackcap	back		0.51		1.68304	1.29876	2.12852		1.25612	0.770653	1.88992		1.59557	1,64	0.211114
Sylvia atricapilla	breast		0.69		2.08511	1.51679	2.7651		2.46728	1.4904	3.75245		0.424566	1,64	0.517
	head		20.99		2.22216	1.67436	2.86542		1.36011	0.842189	2.03318		3.96442	1,64	0.0507443
Great tit	back		1.5		1.15966	0.758598	1.71483		1.46489	0.932991	2.21569		0.661741	1,48	0.419963
Parus major	breast		3.518		1.81804	1.32703	2.4447		1.44011	0.80289	2.42977		0.643156	1,48	0.426523
	cheek		1.32		1.4924	0.984682	2.19079		2.01887	1.43559	2.77798		1.41501	1,48	0.240077
	head		3.89		1.72418	0.996182	2.82653		2.37604	1.52007	3.58035		0.944003	1,48	0.336121
Blue tit	back		1.288		1.91383	1.42744	2.48809		1.27947	0.727817	2.02675		2.4955	1,35	0.123169
Cyanistes caeruleus	breast		1.643		1.16204	0.77094	1.65295		1.49744	0.940185	2.21663		0.888143	1,35	0.352441
	cheek		1.228		2.10762	1.27581	3.20082		2.84755	1.86228	4.09329		1.10771	1,35	0.299793
	head		2.744		2.53963	1.64497	3.67634		2.93882	1.98295	4.12826		0.318817	1,35	0.57592
Greenfinch	back		2.44		1.31782	0.97417	1.7255		1.48533	0.860449	2.32439		0.214749	1,59	0.644775
Carduelis chloris	breast		1.95		1.59979	1.16457	2.12033		1.94824	1.27212	2.80378		0.649963	1,59	0.423364
	head		2.76		1.3295	0.927761	1.82078		1.42835	0.833177	2.22485		0.0629573	1,59	0.802753
	rump		1.54		2.41382	1.85255	3.06639		1.21826	0.766044	1.80146		8.27119	1,59	0.00559636
	tail		2.288		2.47619	1.85452	3.20857		3.74906	2.45309	5.38723		3.34108	1,59	0.0726279
